# Supplementary material for: Monte Carlo Simulations Suggest Current Chlortetracycline Drug-Residue Based Withdrawal Periods Would Not Control Antimicrobial Resistance Dissemination from Feedlot to Slaughterhouse
Source: Front Microbiol. 2017 Sep 20;8:1753. doi: 10.3389/fmicb.2017.01753 (PMC5627025; doi:10.3389/fmicb.2017.01753)
Supplement: Supplementary file 1 [file Table1.XLSX]

## Sheet: Beta_ij
Author	Year	Experiment ID or Recipient--Donor	Description_of_conditions	Data Source within Manuscript	Initial_total_cell_density_or_nu	Beta_Units	Beta_donor (density dependent)	logbeta	Freq_Dependent_beta	Freq_dependent_logbeta
Freter	1983	1	stirred broth	Table 2	10000000	ml/cells*hr	1.2e-14	-13.9208	1.2e-07	-6.92082
Freter	1983	2	not stirred broth	Table 2	10000000	ml/cells*hr	9.2e-14	-13.0362	9.2e-07	-6.03621
Freter	1983	3	CF with F-strains	Table 2	10000000	ml/cells*hr	6.3e-16	-15.2007	6.3e-09	-8.20066
Freter	1983	4	CF with F-strains	Table 2	10000000	ml/cells*hr	7.9e-15	-14.1024	7.9e-08	-7.10237
Freter	1983	5	CF with F-strains	Table 2	10000000	ml/cells*hr	2.6e-14	-13.585	2.6e-07	-6.58503
Freter	1983	6	CF with F-strains	Table 2	10000000	ml/cells*hr	8e-15	-14.0969	8e-08	-7.09691
Freter	1983	7	CF with F-strains	Table 2	10000000	ml/cells*hr	1.8e-14	-13.7447	1.8e-07	-6.74473
Freter	1983	8	CF with F-strains	Table 2/Fig 3 for pop density	10000000	ml/cells*hr	7.1e-15	-14.1487	7.1e-08	-7.14874
Freter	1983	9	CF with F-strains	Table 2	10000000	ml/cells*hr	5.8e-14	-13.2366	5.8e-07	-6.23657
Freter	1983	10	CF with F-strains	Table 2	10000000	ml/cells*hr	5.2e-14	-13.284	5.2e-07	-6.284
Freter	1983	11	CF with F-strains	Table 2	10000000	ml/cells*hr	8.6e-14	-13.0655	8.6e-07	-6.0655
Freter	1983	12	CF with cecal flora	Table 2	10000000	ml/cells*hr	1.5e-15	-14.8239	1.5e-08	-7.82391
Freter	1983	13	CF with cecal flora	Table 2	10000000	ml/cells*hr	1.9e-15	-14.7212	1.9e-08	-7.72125
Freter	1983	14	CF with cecal flora	Table 2	10000000	ml/cells*hr	4.8e-15	-14.3188	4.8e-08	-7.31876
Gordon	1992	1--1	broth	Table 2	30000000	ml/cells*hr	4.46684e-15	-14.35	1.34005e-07	-6.87288
Gordon	1992	1--5	broth	Table 2	30000000	ml/cells*hr	1.23027e-13	-12.91	3.69081e-06	-5.43288
Gordon	1992	1--27	broth	Table 2	30000000	ml/cells*hr	2.88403e-14	-13.54	8.65209e-07	-6.06288
Gordon	1992	1--33	broth	Table 2	30000000	ml/cells*hr	1.28825e-12	-11.89	3.86475e-05	-4.41288
Gordon	1992	1--35	broth	Table 2	30000000	ml/cells*hr	7.24436e-15	-14.14	2.17331e-07	-6.66288
Gordon	1992	1--45	broth	Table 2	30000000	ml/cells*hr	1.09648e-13	-12.96	3.28943e-06	-5.48288
Gordon	1992	1--47	broth	Table 2	30000000	ml/cells*hr	2.29087e-12	-11.64	6.8726e-05	-4.16288
Gordon	1992	1--55	broth	Table 2	30000000	ml/cells*hr	7.58578e-14	-13.12	2.27573e-06	-5.64288
Gordon	1992	1--57	broth	Table 2	30000000	ml/cells*hr	7.94328e-18	-17.1	2.38298e-10	-9.62288
Gordon	1992	1--69	broth	Table 2	30000000	ml/cells*hr	2.69154e-13	-12.57	8.0746e-06	-5.09288
Gordon	1992	5--1	broth	Table 2	30000000	ml/cells*hr	7.07946e-16	-15.15	2.12384e-08	-7.67288
Gordon	1992	5--5	broth	Table 2	30000000	ml/cells*hr	5.01187e-13	-12.3	1.50356e-05	-4.82288
Gordon	1992	5--27	broth	Table 2	30000000	ml/cells*hr	1e-14	-14	3e-07	-6.52288
Gordon	1992	5--35	broth	Table 2	30000000	ml/cells*hr	1.14815e-14	-13.94	3.44446e-07	-6.46288
Gordon	1992	5--45	broth	Table 2	30000000	ml/cells*hr	1.02329e-15	-14.99	3.06988e-08	-7.51288
Gordon	1992	5--47	broth	Table 2	30000000	ml/cells*hr	1e-13	-13	3e-06	-5.52288
Gordon	1992	5--55	broth	Table 2	30000000	ml/cells*hr	2.88403e-15	-14.54	8.65209e-08	-7.06288
Gordon	1992	5--57	broth	Table 2	30000000	ml/cells*hr	3.23594e-17	-16.49	9.70781e-10	-9.01288
Gordon	1992	5--69	broth	Table 2	30000000	ml/cells*hr	1.02329e-14	-13.99	3.06988e-07	-6.51288
Gordon	1992	27--1	broth	Table 2	30000000	ml/cells*hr	3.46737e-16	-15.46	1.04021e-08	-7.98288
Gordon	1992	27--5	broth	Table 2	30000000	ml/cells*hr	3.23594e-18	-17.49	9.70781e-11	-10.0129
Gordon	1992	27--27	broth	Table 2	30000000	ml/cells*hr	2.51189e-13	-12.6	7.53566e-06	-5.12288
Gordon	1992	27--33	broth	Table 2	30000000	ml/cells*hr	2.95121e-16	-15.53	8.85363e-09	-8.05288
Gordon	1992	27--35	broth	Table 2	30000000	ml/cells*hr	1.69824e-16	-15.77	5.09473e-09	-8.29288
Gordon	1992	27--45	broth	Table 2	30000000	ml/cells*hr	7.76247e-17	-16.11	2.32874e-09	-8.63288
Gordon	1992	27--47	broth	Table 2	30000000	ml/cells*hr	9.12011e-17	-16.04	2.73603e-09	-8.56288
Gordon	1992	27--55	broth	Table 2	30000000	ml/cells*hr	1.02329e-16	-15.99	3.06988e-09	-8.51288
Gordon	1992	27--57	broth	Table 2	30000000	ml/cells*hr	2.29087e-17	-16.64	6.8726e-10	-9.16288
Gordon	1992	27--69	broth	Table 2	30000000	ml/cells*hr	5.37032e-18	-17.27	1.61109e-10	-9.79288
Gordon	1992	33--1	broth	Table 2	30000000	ml/cells*hr	9.77237e-17	-16.01	2.93171e-09	-8.53288
Gordon	1992	33--5	broth	Table 2	30000000	ml/cells*hr	5.7544e-16	-15.24	1.72632e-08	-7.76288
Gordon	1992	33--27	broth	Table 2	30000000	ml/cells*hr	1.25893e-15	-14.9	3.77678e-08	-7.42288
Gordon	1992	33--33	broth	Table 2	30000000	ml/cells*hr	3.54813e-13	-12.45	1.06444e-05	-4.97288
Gordon	1992	33--35	broth	Table 2	30000000	ml/cells*hr	7.76247e-15	-14.11	2.32874e-07	-6.63288
Gordon	1992	33--45	broth	Table 2	30000000	ml/cells*hr	1.51356e-16	-15.82	4.54068e-09	-8.34288
Gordon	1992	33--47	broth	Table 2	30000000	ml/cells*hr	1.41254e-14	-13.85	4.23761e-07	-6.37288
Gordon	1992	33--55	broth	Table 2	30000000	ml/cells*hr	8.91251e-16	-15.05	2.67375e-08	-7.57288
Gordon	1992	33--57	broth	Table 2	30000000	ml/cells*hr	2.88403e-17	-16.54	8.65209e-10	-9.06288
Gordon	1992	33--69	broth	Table 2	30000000	ml/cells*hr	1.31826e-14	-13.88	3.95477e-07	-6.40288
Gordon	1992	35--1	broth	Table 2	30000000	ml/cells*hr	1.07152e-18	-17.97	3.21456e-11	-10.4929
Gordon	1992	35--5	broth	Table 2	30000000	ml/cells*hr	1.51356e-17	-16.82	4.54068e-10	-9.34288
Gordon	1992	35--27	broth	Table 2	30000000	ml/cells*hr	2.95121e-18	-17.53	8.85363e-11	-10.0529
Gordon	1992	35--33	broth	Table 2	30000000	ml/cells*hr	1.99526e-16	-15.7	5.98579e-09	-8.22288
Gordon	1992	35--35	broth	Table 2	30000000	ml/cells*hr	3.98107e-15	-14.4	1.19432e-07	-6.92288
Gordon	1992	35--45	broth	Table 2	30000000	ml/cells*hr	2.81838e-17	-16.55	8.45515e-10	-9.07288
Gordon	1992	35--47	broth	Table 2	30000000	ml/cells*hr	3.31131e-14	-13.48	9.93393e-07	-6.00288
Gordon	1992	35--55	broth	Table 2	30000000	ml/cells*hr	4.2658e-18	-17.37	1.27974e-10	-9.89288
Gordon	1992	35--57	broth	Table 2	30000000	ml/cells*hr	3.80189e-17	-16.42	1.14057e-09	-8.94288
Gordon	1992	35--69	broth	Table 2	30000000	ml/cells*hr	3.38844e-15	-14.47	1.01653e-07	-6.99288
Gordon	1992	45--1	broth	Table 2	30000000	ml/cells*hr	2.88403e-17	-16.54	8.65209e-10	-9.06288
Gordon	1992	45--5	broth	Table 2	30000000	ml/cells*hr	2.51189e-18	-17.6	7.53566e-11	-10.1229
Gordon	1992	45--27	broth	Table 2	30000000	ml/cells*hr	2.29087e-16	-15.64	6.8726e-09	-8.16288
Gordon	1992	45--33	broth	Table 2	30000000	ml/cells*hr	3.01995e-17	-16.52	9.05986e-10	-9.04288
Gordon	1992	45--35	broth	Table 2	30000000	ml/cells*hr	4.67735e-17	-16.33	1.40321e-09	-8.85288
Gordon	1992	45--45	broth	Table 2	30000000	ml/cells*hr	5.37032e-16	-15.27	1.6111e-08	-7.79288
Gordon	1992	45--47	broth	Table 2	30000000	ml/cells*hr	8.70964e-14	-13.06	2.61289e-06	-5.58288
Gordon	1992	45--55	broth	Table 2	30000000	ml/cells*hr	1.25892e-17	-16.9	3.77678e-10	-9.42288
Gordon	1992	45--57	broth	Table 2	30000000	ml/cells*hr	1.54882e-17	-16.81	4.64645e-10	-9.33288
Gordon	1992	45--69	broth	Table 2	30000000	ml/cells*hr	3.09029e-15	-14.51	9.27089e-08	-7.03288
Gordon	1992	47--1	broth	Table 2	30000000	ml/cells*hr	1e-17	-17	3e-10	-9.52288
Gordon	1992	47--5	broth	Table 2	30000000	ml/cells*hr	2.23872e-15	-14.65	6.71616e-08	-7.17288
Gordon	1992	47--27	broth	Table 2	30000000	ml/cells*hr	1.28825e-15	-14.89	3.86475e-08	-7.41288
Gordon	1992	47--33	broth	Table 2	30000000	ml/cells*hr	5.24807e-16	-15.28	1.57442e-08	-7.80288
Gordon	1992	47--35	broth	Table 2	30000000	ml/cells*hr	2.13796e-17	-16.67	6.41389e-10	-9.19288
Gordon	1992	47--45	broth	Table 2	30000000	ml/cells*hr	3.46737e-15	-14.46	1.04021e-07	-6.98288
Gordon	1992	47--47	broth	Table 2	30000000	ml/cells*hr	7.58578e-14	-13.12	2.27573e-06	-5.64288
Gordon	1992	47--55	broth	Table 2	30000000	ml/cells*hr	6.16595e-17	-16.21	1.84978e-09	-8.73288
Gordon	1992	47--57	broth	Table 2	30000000	ml/cells*hr	1.58489e-16	-15.8	4.75468e-09	-8.32288
Gordon	1992	47--69	broth	Table 2	30000000	ml/cells*hr	1.86209e-15	-14.73	5.58626e-08	-7.25288
Gordon	1992	55--1	broth	Table 2	30000000	ml/cells*hr	1.07152e-16	-15.97	3.21456e-09	-8.49288
Gordon	1992	55--5	broth	Table 2	30000000	ml/cells*hr	1.62181e-14	-13.79	4.86543e-07	-6.31288
Gordon	1992	55--27	broth	Table 2	30000000	ml/cells*hr	5.24807e-16	-15.28	1.57442e-08	-7.80288
Gordon	1992	55--33	broth	Table 2	30000000	ml/cells*hr	1.58489e-13	-12.8	4.75468e-06	-5.32288
Gordon	1992	55--35	broth	Table 2	30000000	ml/cells*hr	7.07946e-15	-14.15	2.12384e-07	-6.67288
Gordon	1992	55--45	broth	Table 2	30000000	ml/cells*hr	6.45654e-16	-15.19	1.93696e-08	-7.71288
Gordon	1992	55--47	broth	Table 2	30000000	ml/cells*hr	4.57088e-15	-14.34	1.37126e-07	-6.86288
Gordon	1992	55--55	broth	Table 2	30000000	ml/cells*hr	4.0738e-14	-13.39	1.22214e-06	-5.91288
Gordon	1992	55--57	broth	Table 2	30000000	ml/cells*hr	1.09648e-17	-16.96	3.28943e-10	-9.48288
Gordon	1992	55--69	broth	Table 2	30000000	ml/cells*hr	1.65959e-15	-14.78	4.97876e-08	-7.30288
Gordon	1992	57--1	broth	Table 2	30000000	ml/cells*hr	8.31764e-16	-15.08	2.49529e-08	-7.60288
Gordon	1992	57--5	broth	Table 2	30000000	ml/cells*hr	3.80189e-15	-14.42	1.14057e-07	-6.94288
Gordon	1992	57--27	broth	Table 2	30000000	ml/cells*hr	3.63078e-15	-14.44	1.08923e-07	-6.96288
Gordon	1992	57--33	broth	Table 2	30000000	ml/cells*hr	1.58489e-13	-12.8	4.75468e-06	-5.32288
Gordon	1992	57--35	broth	Table 2	30000000	ml/cells*hr	6.76083e-16	-15.17	2.02825e-08	-7.69288
Gordon	1992	57--45	broth	Table 2	30000000	ml/cells*hr	1.38038e-16	-15.86	4.14115e-09	-8.38288
Gordon	1992	57--47	broth	Table 2	30000000	ml/cells*hr	2.13796e-12	-11.67	6.41389e-05	-4.19288
Gordon	1992	57--55	broth	Table 2	30000000	ml/cells*hr	8.1283e-15	-14.09	2.43849e-07	-6.61288
Gordon	1992	57--57	broth	Table 2	30000000	ml/cells*hr	7.58578e-16	-15.12	2.27573e-08	-7.64288
Gordon	1992	57--69	broth	Table 2	30000000	ml/cells*hr	9.54993e-16	-15.02	2.86498e-08	-7.54288
Gordon	1992	69--1	broth	Table 2	30000000	ml/cells*hr	2.63027e-16	-15.58	7.8908e-09	-8.10288
Gordon	1992	69--5	broth	Table 2	30000000	ml/cells*hr	4.46684e-15	-14.35	1.34005e-07	-6.87288
Gordon	1992	69--27	broth	Table 2	30000000	ml/cells*hr	2.69154e-15	-14.57	8.0746e-08	-7.09288
Gordon	1992	69--33	broth	Table 2	30000000	ml/cells*hr	4.0738e-15	-14.39	1.22214e-07	-6.91288
Gordon	1992	69--35	broth	Table 2	30000000	ml/cells*hr	1.25893e-15	-14.9	3.77678e-08	-7.42288
Gordon	1992	69--45	broth	Table 2	30000000	ml/cells*hr	2.18776e-16	-15.66	6.56328e-09	-8.18288
Gordon	1992	69--47	broth	Table 2	30000000	ml/cells*hr	1.25892e-12	-11.9	3.77678e-05	-4.42288
Gordon	1992	69--55	broth	Table 2	30000000	ml/cells*hr	7.94328e-16	-15.1	2.38298e-08	-7.62288
Gordon	1992	69--57	broth	Table 2	30000000	ml/cells*hr	8.31764e-18	-17.08	2.49529e-10	-9.60288
Gordon	1992	69--69	broth	Table 2	30000000	ml/cells*hr	6.16595e-13	-12.21	1.84979e-05	-4.73288
Gordon	1992	1-J53	broth	Table 5	30000001	ml/cells*hr	6.45654e-14	-13.19	1.93696e-06	-5.71288
Gordon	1992	5-J53	broth	Table 5	30000002	ml/cells*hr	1.62181e-14	-13.79	4.86543e-07	-6.31288
Gordon	1992	27-J53	broth	Table 5	30000003	ml/cells*hr	3.71535e-17	-16.43	1.11461e-09	-8.95288
Gordon	1992	33-J53	broth	Table 5	30000004	ml/cells*hr	1.07152e-14	-13.97	3.21456e-07	-6.49288
Gordon	1992	35-J53	broth	Table 5	30000005	ml/cells*hr	8.12831e-17	-16.09	2.43849e-09	-8.61288
Gordon	1992	45-J53	broth	Table 5	30000006	ml/cells*hr	4.67735e-17	-16.33	1.40321e-09	-8.85288
Gordon	1992	47-J53	broth	Table 5	30000007	ml/cells*hr	2.23872e-15	-14.65	6.71617e-08	-7.17288
Gordon	1992	55-J53	broth	Table 5	30000008	ml/cells*hr	5.24807e-14	-13.28	1.57442e-06	-5.80288
Gordon	1992	57-J53	broth	Table 5	30000009	ml/cells*hr	2.69154e-12	-11.57	8.07461e-05	-4.09288
Gordon	1992	69-J53	broth	Table 5	30000010	ml/cells*hr	1.20226e-14	-13.92	3.60679e-07	-6.44288
Gordon	1992	CSH50-1	broth	Table 5	30000011	ml/cells*hr	5.62341e-14	-13.25	1.68702e-06	-5.77288
Gordon	1992	CSH50-5	broth	Table 5	30000012	ml/cells*hr	8.1283e-13	-12.09	2.43849e-05	-4.61288
Gordon	1992	CSH50-27	broth	Table 5	30000013	ml/cells*hr	3.16228e-12	-11.5	9.48684e-05	-4.02288
Gordon	1992	CSH50-33	broth	Table 5	30000014	ml/cells*hr	2.23872e-12	-11.65	6.71617e-05	-4.17288
Gordon	1992	CSH50-35	broth	Table 5	30000015	ml/cells*hr	3.38844e-13	-12.47	1.01653e-05	-4.99288
Gordon	1992	CSH50-45	broth	Table 5	30000016	ml/cells*hr	3.98107e-12	-11.4	0.000119432	-3.92288
Gordon	1992	CSH50-55	broth	Table 5	30000018	ml/cells*hr	5.88844e-13	-12.23	1.76653e-05	-4.75288
Gordon	1992	CSH50-57	broth	Table 5	30000019	ml/cells*hr	1.44544e-14	-13.84	4.33632e-07	-6.36288
Gordon	1992	CSH50-69	broth	Table 5	30000020	ml/cells*hr	8.51138e-13	-12.07	2.55342e-05	-4.59288
Levin	1979	CSH50-J53	broth, 10mL. Exponential growth phase	Fig 1B	11000000	ml/cells*hr	4.4e-12	-11.3565	4.84e-05	-4.31515
Levin	1979	CSH50-J53	broth, 10mL. Stationary phase	Fig 3B	500000000	ml/cells*hr	4.4e-14	-13.3565	2.2e-05	-4.65758
Levin	1979	CSH50-J53	broth, 10mL. Steady state chemostat equilibrium	Fig 4B	500000000	ml/cells*hr	2.55e-14	-13.5935	1.275e-05	-4.89449
Simonsen	1990	K12-K12	broth, 10mL	Table 2	10000000	ml/cells*hr	1.7e-12	-11.7696	1.7e-05	-4.76955
Simonsen	1990	K12-K12	broth, 10mL	Table 2	100000	ml/cells*hr	1.3e-12	-11.8861	1.3e-07	-6.88606
Simonsen	1990	K12-K12	broth, 10mL	Table 2	1000	ml/cells*hr	1.4e-12	-11.8539	1.4e-09	-8.85387

## Sheet: Nmax
Author	Year	Sample type and relevant study details	Number_of_replicates	Data Source within Manuscript	Units	Mean_log10CFU
Aslam	2004	Fecal samples-1 month on feedlot	8	Figure 1	log10 CFU per g	5.93
Aslam	2004	Fecal samples-5 months on feedlot	8	Figure 1	log10 CFU per g	5
Laven	2003	Colon contents at slaughter	167	Table 5	log10 count per g or mL	5.3
Laven	2003	Feces	152	Table 5	log10 count per g or mL	5.4
Alexander	2010	Fecal samples-cattle treated with AS700, non-selective agar	30	Table 1	log10 CFU per g	6.6
Alexander	2010	Fecal samples-cattle without AM, non-selective agar	30	Table 1	log10 CFU per g	6.5
Agga	2016	Fecal samples from control animals at arrival, non-selective agar	150	Text	log10CFU per swab	4.73
Agga	2016	Fecal samples from CTC animals at arrival, non-selective agar	150	Text	log10CFU per swab	4.81
Agga	2016	Fecal samples from CTC animals at 5 days post tx, non-selective agar	150	Text	log10CFU per swab	4.7
Agga	2016	Fecal samples from control animals at 5 days post tx, non-selective agar	150	Text	log10CFU per swab	3.51
Agga	2016	Fecal samples from CTC animals at 27 days post tx, non-selective agar	150	Figure 2A	log10CFU per swab	4.56
Agga	2016	Fecal samples from control animals at 27 days post tx, non-selective agar	150	Figure 2A	log10CFU per swab	4.67
Agga	2016	Fecal samples from CTC animals at 75 days post tx, non-selective agar	150	Text	log10CFU per swab	5.94
Agga	2016	Fecal samples from control animals at 75 days post tx, non-selective agar	150	Text	log10CFU per swab	6.13
Agga	2016	Fecal samples from CTC animals at 117 days post tx, non-selective agar	150	Figure 2A	log10CFU per swab	6.67
Agga	2016	Fecal samples from control animals at 117 days post tx, non-selective agar	150	Figure 2A	log10CFU per swab	7.06
Alexander	2009	fecal samples from control animals, day 0	3	Figure 2A	log10 CFU per g	7.3
Alexander	2009	fecal samples from CTC-SUL animals, day 0	3	Figure 2A	log10 CFU per g	7.3
Alexander	2009	fecal samples from CTC animals, day 0	3	Figure 2A	log10 CFU per g	7.1
Branham	2007	fecal samples, control at arrival	160	Figure 4.1	log10 CFU per g	6.08
Branham	2007	fecal samples, monensin at arrival	160	Figure 4.1	log10 CFU per g	6.17
Branham	2007	fecal samples, tylosin at arrival	160	Figure 4.1	log10 CFU per g	6.33
Branham	2007	fecal samples, monensin/tylosin at arrival	160	Figure 4.1	log10 CFU per g	6.22
Branham	2007	fecal samples, control at re-implant	160	Figure 4.1	log10 CFU per g	6.38
Branham	2007	fecal samples, monensin at re-implant	160	Figure 4.1	log10 CFU per g	6.5
Branham	2007	fecal samples, tylosin at re-implant	160	Figure 4.1	log10 CFU per g	6.33
Branham	2007	fecal samples, monensin/tylosin at re-implant	160	Figure 4.1	log10 CFU per g	6.33
Branham	2007	fecal samples, control at harvest	40	Figure 4.1	log10 CFU per g	6.28
Branham	2007	fecal samples, monensin at harvest	40	Figure 4.1	log10 CFU per g	6.33
Branham	2007	fecal samples, tylosin at harvest	40	Figure 4.1	log10 CFU per g	6
Branham	2007	fecal samples, monensin/tylosin at harvest	40	Figure 4.1	log10 CFU per g	5.83
Lowrance	2007	fecal samples, control steers, maximum CFU over the 28 days of the study (day 0)	31	Figure 3A	log10 CFU per g	6.33
Lowrance	2007	fecal samples, control steers, minimum CFU over the 28 days of the study (day 20)	31	Figure 3A	log10 CFU per g	5.69
Lowrance	2007	fecal samples, control steers, day 2	31	Figure 3A	log10 CFU per g	6.17
Lowrance	2007	fecal samples, control steers, day 6	31	Figure 3A	log10 CFU per g	6.28
Lowrance	2007	fecal samples, control steers, day 9	31	Figure 3A	log10 CFU per g	6
Lowrance	2007	fecal samples, control steers, day 13	31	Figure 3A	log10 CFU per g	5.78
Lowrance	2007	fecal samples, control steers, day 16	31	Figure 3A	log10 CFU per g	5.67
Lowrance	2007	fecal samples, control steers, day 28	31	Figure 3A	log10 CFU per g	5.94
Callaway	2002	Cecum, controls	4	Figure 3A	log10 CFU per g	7.1
Callaway	2002	colon, controls	4	Figure 3A	log10 CFU per g	7.3
Callaway	2002	rectum, controls	4	Figure 3A	log10 CFU per g	7.2
Krause	2003	upper colon contents, high grain diet	3	Figure 1A	log10 CFU per mL	6.5
Krause	2003	feces, high grain diet	3	Figure 1A	log10 CFU per mL	7.15

## Sheet: EC50 MIC
Strain	MIC	a_max	H	EC50	a_max_se	H_se	EC50_se			This data is directly from Ahmad A, Graesboll K, Christiansen LE, Toft N, Matthews L, Nielsen SS. 2015. Pharmacokinetic-pharmacodynamic model to evaluate intramuscular tetracycline treatment protocols to prevent antimicrobial resistance in pigs. Antimicrob Agents Chemother 59:1634-1642., supplementary table 1
1	0.5	1.72	2.52	0.23	0.04	0.32	0.01
2	0.5	1.75	1.95	0.17	0.05	0.2	0.01
3	0.5	1.47	5.43	0.29	0.06	2.44	0.02
4	0.5	1.81	1.39	0.18	0.05	0.11	0.01
5	0.25	1.84	1.58	0.18	0.05	0.15	0.01
6	0.5	1.67	2.61	0.2	0.03	0.24	0.01
7	2	2.03	8.35	1.14	0.02	3.52	0.06
8	0.5	1.8	1.6	0.23	0.04	0.12	0.01
9	0.5	1.69	1.93	0.16	0.04	0.18	0.01
10	0.5	1.65	1.9	0.15	0.04	0.16	0.01
11	0.5	2.03	2.22	0.18	0.04	0.18	0.01
12	0.5	1.68	2.8	0.22	0.04	0.31	0.01
13	0.5	1.92	2.24	0.18	0.04	0.19	0.01
14	0.5	1.69	2.09	0.18	0.04	0.21	0.01
15	0.25	1.66	1.68	0.11	0.03	0.1	0
16	0.5	1.73	1.68	0.14	0.05	0.15	0.01
17	8	1.87	7.62	4.31	0.06	13.73	0.61
18	0.5	1.8	1.88	0.15	0.05	0.17	0.01
19	0.5	1.9	2.04	0.17	0.05	0.21	0.01
20	0.5	1.92	1.62	0.17	0.07	0.19	0.02
21	0.25	2.02	1.8	0.14	0.06	0.2	0.01
22	0.25	1.84	1.69	0.14	0.06	0.18	0.01
23	0.5	1.92	1.72	0.14	0.05	0.15	0.01
24	0.5	1.89	1.52	0.15	0.07	0.17	0.01
25	0.25	1.96	3.14	0.11	0.07	0.55	0.01
26	0.5	1.95	1.55	0.22	0.05	0.12	0.01
27	0.5	1.88	1.62	0.12	0.06	0.15	0.01
28	0.25	1.6	1.83	0.11	0.06	0.21	0.01
29	0.5	1.84	1.89	0.15	0.05	0.19	0.01
30	0.5	1.79	1.44	0.14	0.09	0.2	0.02
31	0.5	2.03	1.58	0.16	0.07	0.17	0.01
32	0.5	1.96	1.68	0.18	0.06	0.17	0.01
33	64	1.73	4.23	30.05	0.04	1.35	1.9
34	128	1.96	10	75.37	0.02	6.97	8.64
35	32	1.85	4.73	16.05	0.06	2.2	1
36	16	1.9	10	10.86	0.01	1.06	0.37
37	512	1.87	3.99	186.89	0.01	0.84	15.76
38	32	1.8	6.42	33.42	0.06	6.72	2.21
39	32	1.88	10	18.73	0.02	6.85	2.04
40	16	1.76	10	17.12	0.06	66.37	7.72
41	64	1.97	8.23	67.47	0.06	22.19	9.9
42	32	1.38	2.13	14.2	0.02	0.21	0.76
43	64	1.88	6.94	35.88	0.02	1.88	1.21
44	16	1.75	10	9.78	0.01	2.65	0.53
45	128	1.82	8.62	68.27	0.06	27.57	14.3
46	32	1.92	6.63	16.7	0.06	7.73	1.13
47	64	1.72	10	82.29	0.01	1.59	3.4
48	0.25	1.97	2.46	0.1	0.05	0.25	0
49	64	1.84	8.13	36.91	0.02	3.56	2.36
50	128	1.86	10	82.43	0.01	2.12	4.57

## Sheet: delta
Authors, Year	Year	Description_of_conditions	Min	Mean	Max
Dolliver et al	2008	Spiked turkey manure composting, pH 8.4-8.6, manure reached 54-64 degrees C; indoor composting on concrete in late fall/early winter but not heated building;	0.0279167	0.0320833	0.03625
Arikan et al	2008	Medicated calf manure,in a digester, diluted to 5% total solids (5 fold dilution), 35 degrees C in digester, continuous stirring.		0.0385082
Arikan et al	2009	Medicated calf manure (with straw and woodchips), composted and sterilized; 30 days composted in 250mL flask inside sealed tank, 55 degrees C, pH 8.3	0.00560799	0.00695358	0.00829918
Arikan et al	2009	Medicated calf manure (with straw and woodchips), room temperature incubation (25 C) in 250mL flasks for 30 days, pH 8.3		0.000926271
Arikan et al	2009	Medicated calf manure (with straw and woodchips), room temperature and sterilizied, in 250mL flasks for 30 days, pH 8.3		0.00070545
Carlson and Mabury	2005	CTC applied to agricultural soil, with manure (Northumberland county, Canada) in summer (16 to 20 degrees C, 60-80mm precipitation)	0.000802254	0.00120338	0.00152006
Eisner and Wulf	1963	CTC degradation in dog urine at 37C, pH 5.5-6.8		0.0333
Gavalchin and Katz	1994	CTC degration in soils contaminated with manure from treated chicken at 30C		0.000777
